# Supplementary material for: An analysis on the electrophoretic mobility of cellulose nanocrystals as thin cylinders: relaxation and end effect
Source: Royal Society of Chemistry journal article supplement (doi:10.1039/c9ra05156b), 2019-01-01
Supplement: c9ra05156b1.pdf [file c9ra05156b1.pdf]

## SUPPROTING INFORMATION

### An analysis on the electrophoretic mobility of cellulose nanocrystals as a thin cylinder: relaxation and end effect

Kuan-Hsuan Lin,<sup>\*a</sup> Donghao Hu,<sup>a</sup> Takuya Sugimoto,<sup>b</sup> Feng-Cheng Chang,<sup>c</sup>  
Motoyoshi Kobayashi<sup>a</sup> and Toshiharu Enomae<sup>a</sup>

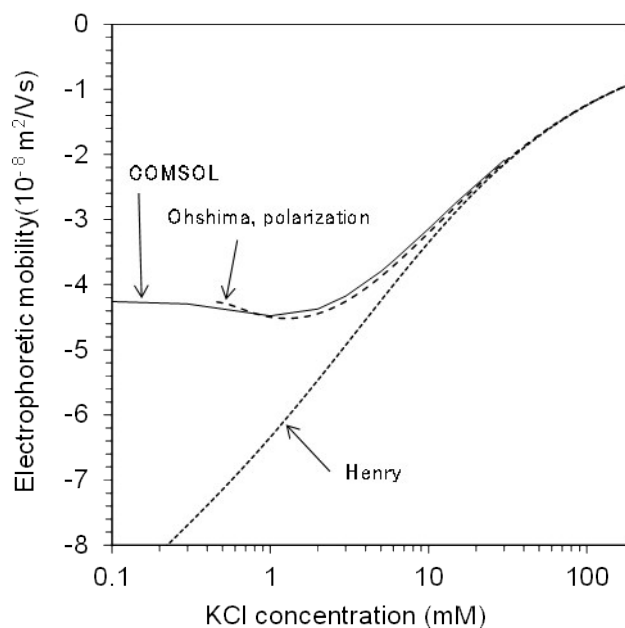

Figure. S1. When the Poisson-Boltzmann (PB) model is applied to obtain a zeta potential from surface charge density, the “Ohshima, polarization” eq. captures the double layer polarization effect (represented by a minimum mobility and reduction from the “Henry” eq.) and reasonably agrees with the numerical solution of Poisson-Nernst-Planck and the Stokes equations using “COMSOL”, modelling software, for a sphere.

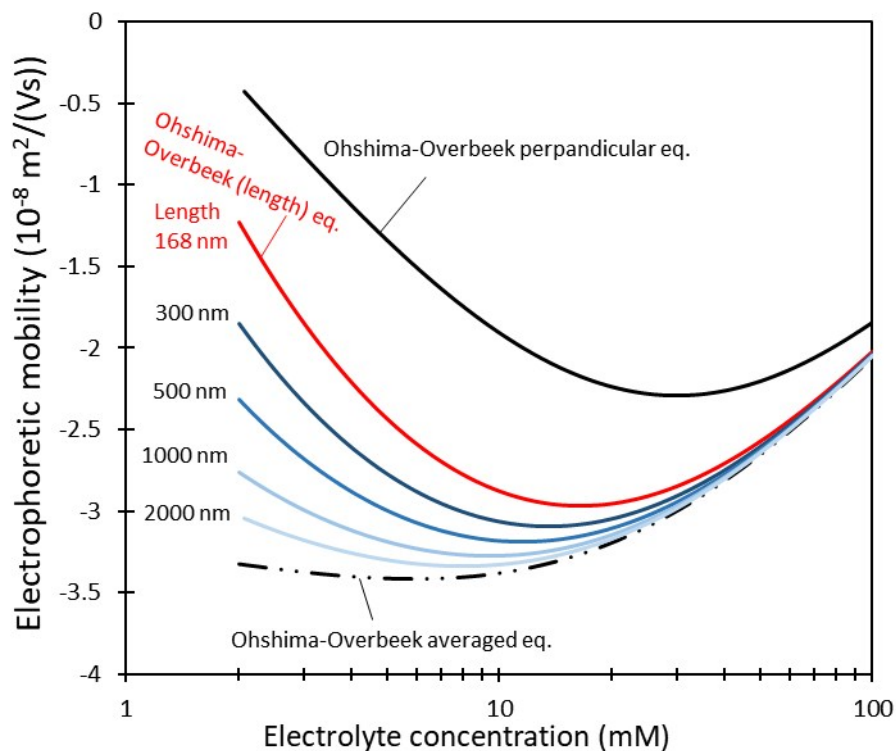

Figure. S2. An effect of the CNCs length depicted with “Ohshima-Overbeek (length) eq.” with an assumption that the radius, zeta potential, and surface charge density are constant (independent with the length of CNCs). With increasing CNCs length, the “Ohshima-Overbeek (length) eq.” curve becomes closer to “Ohshima-Overbeek averaged eq.”, suggesting that the end effect plays a major role for shorter CNCs.
